# 1 **Chromosome-level and haplotype-resolved genome assembly** 2 **enabled by high-throughput single-cell sequencing of gamete** 3 **genomes**

4  
5  
6 José A. Campoy<sup>1,∇</sup>, Hequan Sun<sup>1,2,∇</sup>, Manish Goel<sup>1</sup>, Wen-Biao Jiao<sup>1</sup>, Kat Folz-Donahue<sup>3</sup>,  
7 Christian Kukat<sup>3</sup>, Manuel Rubio<sup>4</sup>, David Ruiz<sup>4</sup>, Bruno Huettel<sup>5</sup> and Korbinian Schneeberger<sup>1,2,\*</sup>

8  
9 <sup>∇</sup>These authors contributed equally.

10  
11 <sup>1</sup>Department of Chromosome Biology, Max Planck Institute for Plant Breeding Research, Carl-  
12 von-Linné-Weg 10, 50829 Cologne, Germany <sup>2</sup>Faculty of Biology, LMU Munich, Großhaderner  
13 Str. 2, 82152 Planegg-Martinsried, Germany <sup>3</sup>FACS & Imaging Core Facility, Max Planck  
14 Institute for Biology of Ageing, 50931 Cologne, Germany <sup>4</sup>Departament of Plant Breeding,  
15 CEBAS-CSIC, PO Box 164, E-30100, Espinardo, Murcia, Spain <sup>5</sup>Max Planck-Genome-center  
16 Cologne, Carl-von-Linné-Weg 10, 50829 Cologne, Germany

17  
18 \*Correspondence: Korbinian Schneeberger ([schneeberger@mpipz.mpg.de](mailto:schneeberger@mpipz.mpg.de))

19  
20 Key words: single-cell sequencing, haplotype-resolved assembly, haplotyping, phasing, *de*  
21 *novo* assembly

22           **Generating haplotype-resolved, chromosome-level assemblies of heterozygous**  
23 **genomes remains challenging. To address this, we developed gamete binning, a**  
24 **method based on single-cell sequencing of hundreds of haploid gamete genomes,**  
25 **which enables the separation of conventional long sequencing reads into two**  
26 **haplotype-specific read sets. After independently assembling the reads of each**  
27 **haplotype, the contigs are scaffolded to chromosome-level using a genetic map derived**  
28 **from the recombination patterns within the same gamete genomes. As a proof-of-**  
29 **concept, we assembled the two genomes of a diploid apricot tree supported by the**  
30 **analysis of 445 pollen genomes. Both assemblies (N50: 25.5 and 25.8 Mb) featured a**  
31 **haplotyping precision of >99% and were accurately scaffolded to chromosome-level as**  
32 **reflected by high levels of synteny to closely-related species. These two assemblies**  
33 **allowed for first insights into haplotype diversity of apricot and enabled the**  
34 **identification of non-allelic crossover events introducing severe chromosomal**  
35 **anomalies in 1.6% of the pollen genomes.**

36           Currently, most diploid genome assemblies ignore the differences between the  
37 homologous chromosomes and assemble the genomes into one pseudo-haploid sequence,  
38 which is an artificial consensus of both haplotypes. Such an artificial consensus can result in  
39 imprecise gene annotation and misleading biological interpretation<sup>1,2</sup>. To avoid these  
40 problems, it is a common strategy to inbreed or to generate double-haploid genotypes to  
41 enable the assembly of homozygous genomes. More recent alternatives include chromosome  
42 sorting<sup>3</sup>, Hi-C<sup>4,5</sup> and Strand-seq<sup>6</sup> to either separate the chromosomes before sequencing or to  
43 generate additional information that discriminates between the two haplotypes and thereby  
44 reconstructs the sequence of both haplotypes separately. Another elegant method, trio  
45 binning, is based on the separation of whole-genome sequencing reads into haplotype-specific  
46 read sets before assembly using the genomic differences between the parental genomes<sup>2</sup>.  
47 While this is a powerful method, it can be limiting if the parents are not available or unknown<sup>7</sup>.  
48 A solution for this is the sequencing of a few gamete genomes (derived from the focal

49 individual), which is sufficient for the inference of genome-wide haplotypes, but relies on  
50 existing long-contiguity reference sequences<sup>8,9,10,11</sup>.

51 In addition to resolving haplotypes, the generation of chromosome-level assemblies,  
52 which are necessary to understand the full complexity of genomic differences including all  
53 kinds of structural rearrangements, is similarly challenging<sup>12,13</sup>. While recent improvements in  
54 long DNA molecule sequencing<sup>14</sup> promise the assembly of telomere-to-telomere contigs,  
55 genetic maps can reliably help to resolve mis-assemblies as well as guide chromosome-level  
56 scaffolding. The generation of genetic maps, however, relies on a substantial amount of meiotic  
57 recombination which usually implies the genotyping of hundreds of recombinant genomes.  
58 Creating and genotyping sufficiently large populations can be time-consuming and costly and  
59 posts great challenges in species with long juvenile periods<sup>15,16</sup>.

60 To address all these challenges, we present gamete binning, a method for  
61 chromosome-level, haplotype-resolved genome assembly - independent of parental genomes  
62 or recombinant progenies (Fig. 1). The method starts by isolating gamete nuclei from the focal  
63 individual followed by high-throughput single-cell sequencing of hundreds of the haploid  
64 gamete genomes. (For clarification, we collectively refer to both gametophytes in plants and  
65 gametes in animals collectively as gametes, as both have haploid genomes.) The segregation  
66 of sequence variation in the gamete genomes enables a straightforward phasing of all variants  
67 into two haplotypes, which subsequently allows for genetic mapping and sorting of whole-  
68 genome sequencing reads into distinct read sets - each representing a different haplotype.  
69 Assembling these independent read sets leads to haplotype-resolved genome assemblies,  
70 which can be scaffolded to chromosome-level using a gamete genome-derived genetic map.

71 We used gamete binning to assemble the two haploid genomes of a specific, diploid  
72 apricot tree (*Prunus armeniaca*; cultivar 'Rojo Pasion'<sup>17</sup>), which grows in Murcia, southeastern  
73 Spain (Supplementary Figure 1). We first performed a preliminary *de novo* genome assembly  
74 using *Canu*<sup>18</sup> with 19.9 Gb long reads (PacBio, Supplementary Figure 2) derived from DNA  
75 extracted from fruits and corresponding to 82x genome coverage according to a genome size  
76 of ~242.5 Mb estimated by *findGSE*<sup>19</sup> (Methods; Supplementary Figure 3). After purging

77 haplotype-specific contigs, the curated assembly consisted of 939 contigs with a combined  
78 length of 230.9 Mb and an N50 of 563.8 kb, which represents a haploid, but mosaic assembly  
79 of the apricot genome (Methods).

80 To advance this assembly, we isolated pollen grains from ten closed flowers (to avoid  
81 contamination of foreign pollen) and released their nuclei following a protocol based on pre-  
82 filtering followed by bursting<sup>20</sup> (Fig. 1a; Methods). The nuclei mixture was cleaned up using  
83 propidium iodide staining plus sorting by flow cytometry, leading to a solution with 12,600 nuclei  
84 that were loaded into a 10x Chromium Controller in two batches - each with 6,300 nuclei  
85 (Supplementary Figures 1a-d; Supplementary Figure 4; Methods). With this we generated two  
86 10x single-cell genome (CNV) sequencing libraries, which were sequenced with 95 and 124  
87 million 151 bp paired-end reads (Illumina). By exploring the *cellranger*-corrected cell barcodes  
88 within the read data of both libraries, we extracted 691 read sets - each with a minimum of  
89 5,000 read pairs (Methods; Fig. 2a).

90 Aligning the reads of each pollen genome to the curated assembly, we found that the  
91 reads of 246 sets featured high similarity to thrip genomes or included more than one haploid  
92 genome, possibly due to random attachment of multiple nuclei during 10x Genomics library  
93 preparation or the uncompleted separation of pollen nuclei during pollen maturation<sup>21</sup>  
94 (Supplementary Figure 5a-c; Methods). Thus, we selected the set of 445 haploid pollen  
95 genomes. In general, the short read alignments did not show any biases or preferences for  
96 specific regions of the genome as reported for some of the single-cell genome amplification  
97 kits, but covered nearly all regions (99.1%) of the curated assembly (Fig. 2b; Supplementary  
98 Figure 5d).

99 With short read alignments, we identified 578,209 heterozygous SNPs on 702 contigs  
100 with a total length of 218.0 Mb (Fig. 2b; Methods). Even though this implied 1 SNP marker  
101 every 377 bp on average, we observed that the distances between some of the SNP markers  
102 were larger than the usual long reads, which would hamper the haplotype assignment of reads  
103 whenever they aligned to such regions. Overall, we observed 10,452 regions larger than 2 kb  
104 without markers (110.9 Mb) including 237 regions (12.5 Mb), that spanned entire contigs.

105 Regions without markers occur if the two haplotypes are identical (which is a common  
106 phenomenon in domesticated genomes) or if a region exists only in one of the haplotypes (e.g.  
107 a large indel). We distinguished these two cases using the short-read coverage of the  
108 combined pollen read sets, assuming that the regions that are only present in one haplotype  
109 are supported by only approximately half of the reads (Methods). While 7,199 regions (74.5  
110 Mb) were shared between the haplotypes (and were labelled as conserved), we found that  
111 3,253 regions (36.4 Mb) were specific to one of the haplotypes (i.e. deletions; Fig. 2b). Such  
112 regions (i.e. deletions) which are specific to one haplotype can also be used as markers. If  
113 such deletions were linked to nearby SNP markers, we phased them according to their linked  
114 alleles. For deletions on contigs without additional markers, we used the absence and  
115 presence of read alignments in the pollen to assign genotypes.

116 The haploid nature of the 445 selected individual pollen genomes allowed us to phase  
117 all SNP and deletion markers into two haplotypes simply by using the linkage within the pollen  
118 genomes (Fig. 2c-d). To phase the haplotypes across the contigs, we generated two virtual  
119 markers for each contig representing the (imputed) alleles at both ends of the contig. The  
120 markers were grouped into a genetic map with eight linkage groups (corresponding to the eight  
121 homologous chromosome pairs) including 891 contigs with a total length of 228.0 Mb  
122 (corresponding to about 99% of the complete assembly) using *JoinMap* 4.0<sup>22</sup> (Fig. 2e; Fig. 3a)  
123 (Methods).

124 After this, we aligned the PacBio reads to the curated assembly. Using the phased  
125 alleles (of the SNP and deletion markers) within each of the individual PacBio read alignments,  
126 we separated 93.4% of the reads into one of 16 haplotype-specific clusters representing the  
127 two haplotypes of each of the eight linkage groups. Reads that aligned in regions that were  
128 conserved between the two haplotypes were randomly assigned to one of the two haplotype-  
129 specific clusters (Fig. 3a; Methods). Similarity analyses revealed that most of the remaining  
130 6.6% reads were related to organellar genomes or repetitive sequences.

131 The 16 haplotype-specific read sets were independently assembled using *Flye*<sup>24</sup>, which  
132 led to 16 haplotype-specific chromosome assemblies with average N50 values ranging from

133 662.3 kb to 664.6 (Methods). Using the genetic map, we combined the contigs of each  
134 assembly into a pseudo-molecule. This led to two haplotype-resolved chromosome-level  
135 assemblies, both with N50 above 25.0 Mb (Fig. 3a-b; Methods).

136 To assess haplotype accuracy, we additionally whole-genome sequenced the parental  
137 cultivars of 'Rojo Pasion' known as 'Currot' and 'Orange Red'. Using Illumina sequencing  
138 technology, we generated 15.7 and 16.2 Gb short reads of each of the diploid parental  
139 genomes, respectively. Overall, we found that ~99.1% of the *k*-mers that were specific to one  
140 of the haplotype assemblies could be found in the corresponding parental genome illustrating  
141 that almost all of the variation was correctly assigned to haplotypes (Fig. 3c; Table 1; Methods).  
142 Having proved the haplotype accuracy, the assemblies were polished resulting in final  
143 assemblies (N50: 25.5 Mb and 25.8 Mb; Table 1; Methods). To further assess the quality of  
144 the scaffolded chromosome structure, we compared our assemblies with recently assembled  
145 genomes, including those of very closely-related species such as the heterozygous  
146 'Chuanzhihong' apricot (*Prunus armeniaca*)<sup>23</sup> and the Japanese apricot (*Prunus mume*)<sup>25</sup>, and  
147 a more distantly-related species, peach (*Prunus persica*: doubled-haploid genome)<sup>26</sup>, using  
148 *SyRI*<sup>12</sup> (a tool designed for the comparison of chromosome-level assemblies). Our assemblies  
149 showed high consistency in the synteny to these assemblies, reflecting the reliability of the  
150 genetic map and the assembled genome structure (Fig. 3d; Supplementary Figure 6).

151 In contrast to conventional diploid genome assemblies where the two haplotypes are  
152 merged into one artificial consensus sequence, separate haploid assemblies allow for the  
153 analysis of haplotype diversity. Comparing the two haplotype assemblies of 'Rojo Pasion' using  
154 *SyRI*<sup>12</sup> allowed us to gain first insights into the haplotype diversity within an individual apricot  
155 tree. Despite high levels of synteny, the two assemblies revealed large-scale rearrangements  
156 (23 inversions, 1,132 translocation/transpositions and 2,477 distal duplications) between the  
157 haplotypes making up more than 15% of the assembled sequence (38.3 and 46.2 Mb in each  
158 of assemblies; Supplementary Table 1). Using a comprehensive RNA-seq dataset sequenced  
159 from multiple tissues of 'Rojo Pasion' including reproductive buds, vegetative buds, flowers,  
160 leaves, fruits (seeds removed) and barks as well as a published apricot RNA-seq dataset<sup>23</sup>,

161 we predicted 30,378 and 30,661 protein-coding genes within each of the haplotypes (with an  
162 annotation completeness of 96.4% according to a BUSCO<sup>27</sup> analysis). Mirroring the huge  
163 differences in the sequences, we found the vast amount of 942 and 865 expressed, haplotype-  
164 specific genes in each of the haplotypes (Methods; Supplementary Tables 2-3). Such deep  
165 insights into the differences between the haplotypes, which are only enabled by chromosome-  
166 level and haplotype-resolved assemblies, will generally be of high value for the analysis of  
167 agronomically relevant variation.

168 Moreover, the chromosome-level assemblies also allow for fine-grained analyses of the  
169 haploid pollen genomes, which have already undergone recombination during meiosis. Meiotic  
170 recombination is the major mechanism to generate novel variation in offspring genomes.  
171 During meiosis new haplotypes are formed by sequence exchanges between two homologous  
172 chromosomes. To keep chromosome structures intact during such exchanges, it is essential  
173 that recombination only occurs in syntenic regions as otherwise large parts of the chromosome  
174 can be lost or duplicated in the newly formed molecules. Re-analyzing the 445 pollen nuclei  
175 genomes using one of the chromosome-level assemblies as reference, we detected 2,638  
176 meiotic crossover (CO) events (Methods). To improve the resolution of the predicted CO  
177 events (6.1 kb), we selected 2,236 CO events detected in 369 nuclei with a sequencing depth  
178 above 0.1x genome coverage (Supplementary Table 4). Along the chromosomes, CO events  
179 were broadly and positively correlated with the density of protein-coding genes and were  
180 almost completely absent in rearranged regions as expected (Fig. 4; Methods). By  
181 investigating the fine-scale pattern of short read alignment of each nuclei, we identified six CO  
182 events located in rearranged regions (0.3% of 2,236 CO events found in 1.6% of the pollen  
183 genomes), which led to stark chromosomal rearrangements. In each of the six chromosomes  
184 we found duplicated read coverage and pseudo-heterozygous variation in the regions that  
185 were involved in the chromosome rearrangements as induced by the non-allelic CO (Fig. 5).  
186 This evidences the existence of non-allelic recombination in pollen genomes and might open  
187 up a more detailed view on the actual meiotic recombination patterns as compared to what  
188 could be observed in offspring individuals.

189           Taken together, following the elegant rationale of haplotype-based read separation  
190 before genome assembly introduced by trio binning<sup>2</sup>, we present gamete binning. In contrast  
191 to trio binning, gamete binning does not rely on paternal genomes, but instead uses the  
192 genomes of individual gametes to resolve haplotypes. In addition, the recombination patterns  
193 in these gamete genomes can be used to calculate a genetic map, which in turn enables the  
194 generation of chromosome-level assemblies. High-throughput analysis of gamete genomes  
195 avoids tedious generation of offspring progeny and allows to sample the required material in  
196 its ecological context, which makes it possible to analyze meiotic recombination as it occurs in  
197 natural environments. As a result, gamete binning can efficiently and effectively enable  
198 haplotype-resolved and chromosome-level genome assembly of any heterozygous individual  
199 with accessible gametes.



## 200 **Online Methods**

### 201 **DNA extraction, Illumina/PacBio library preparation and sequencing**

202 Fresh developing fruits of 'Rojo Pasion' were frozen in liquid nitrogen immediately after  
203 being sampled in Murcia, Spain. After being shipped to the Max Planck Institute for Plant  
204 Breeding Research (MPIPZ, Cologne, Germany), DNA was extracted from the mesocarp and  
205 exocarp of the fruits using the Plant DNA Kit of Macherey-Nagel™ to create a PacBio  
206 sequencing library. Meanwhile, fresh leaves were sampled from the parental cultivars ('Currot'  
207 and 'Orange Red') at the experimental field of CEBAS-CSIC in Murcia, Spain, and Illumina  
208 short read libraries were prepared after DNA extraction using the Plant DNA Kit of Macherey-  
209 Nagel™.

210 All libraries were sequenced with the respective sequencing machines (Illumina HiSeq  
211 3000 and PacBio Sequel I) at Max Planck Genome-centre Cologne (MP-GC), which led to  
212 19.9 Gb long reads for 'Rojo Pasion' (PacBio; Supplementary Figure 2) and 15.7 and 16.2 Gb  
213 short reads for the parental cultivars (Illumina). Note that the parental WGS data were only  
214 used for haplotype validation and for sorting the individual chromosome assemblies to two sets  
215 of eight chromosomes to match the inheritance of the chromosomes.

### 216 **Pollen nuclei DNA extraction, 10x sc-CNV library preparation and sequencing**

217 Dormant shoots of 'Rojo Pasion' bearing developed flower buds were collected in  
218 Murcia, Spain. Then, the shoots were shipped at 4 °C to MPIPZ (Cologne, Germany) and were  
219 grown in long-day conditions in the greenhouse. Flowers at the pre-anthesis stage were frozen  
220 in liquid nitrogen. Anthers from ten 'Rojo Pasion'<sup>17</sup> flowers were extracted with forceps and  
221 submerged in woody pollen buffer (WPB)<sup>28</sup>. Around 500,000 pollen grains were extracted from  
222 anthers by vortexing them in WPB. The nuclei were isolated from the pollen using a modified  
223 bursting method<sup>20</sup>. Isolated pollen was prefiltered (100µm) and bursted (30um) using  
224 Celltrics™ sieves and woody pollen buffer. The nuclei were then stained with propidium iodide  
225 (PI) at 50 µg/mL just before sorting and counting by flow cytometry to remove pollen grain  
226 debris using a BD FACSAria Fusion™ with high-speed sort settings (70 µm™ nozzle and 70 PSI

227 sheath pressure) and 0.9% NaCl as sheath fluid. The nuclei were identified by PI fluorescence,  
228 light scattering, and autofluorescence characteristics (Supplementary Figure 4). A total of  
229 12,600 nuclei were counted and collected in a solution of 4.2  $\mu$ L phosphate-buffered saline  
230 with 0.1% bovine serum albumin.

231 According to manufacturer's instructions, the nuclei were loaded into a 10x<sup>TM</sup> Chromium  
232 controller in two batches with 6,300 nuclei each, i.e., two 10x sc-CNV libraries were prepared.  
233 In each library, DNA fragments from the same nucleus were ligated with a unique 16-bp  
234 barcode sequence (of A/C/G/T). Both libraries were sequenced using Illumina HiSeq3000 in  
235 the 2x151 bp paired-end mode, totaling 95 and 124 million read pairs, respectively (61.7 Gb).

### 236 **Genome size estimation**

237 After trimming off 10x Genomics barcodes and hexamers from the 61.7 Gb reads of  
238 the two 10x sc-CNV libraries, *k*-mer counting ( $k=21$ ) was performed with *Jellyfish*<sup>29</sup>. The *k*-mer  
239 histogram was provided to *findGSE*<sup>19</sup> to estimate the size of the 'Rojo Pasion' genome under  
240 the heterozygous mode (with '*exp\_hom=200*'; Supplementary Figure 3).

### 241 **Initial diploid-genome assembly and curation**

242 With the 19.9 Gb raw PacBio reads of 'Rojo Pasion' (Supplementary Figure 2), a  
243 preliminary diploid assembly was constructed using *canu*<sup>18</sup> (with options  
244 '*genomeSize=242500000 corMhapSensitivity=high corMinCoverage=0 corOutCoverage=100*  
245 *correctedErrorRate=0.105*').

246 All raw Illumina reads from the 10x libraries were firstly aligned to the initial assembly  
247 using *bowtie2*<sup>30</sup>. Then the *purge haplotigs* pipeline was then used to remove haplotigs (i.e.,  
248 haplotype-specific contigs inflating the true haploid genome) based on statistical analysis of  
249 sequencing depth, and identify primary contigs to build up a curated haploid assembly<sup>31</sup>. To  
250 reduce the false positive rate in defining haplotigs, each haplotig was blasted to the curated  
251 assembly; if over 50% of the haplotig could not be covered by any primary contigs, it was re-  
252 collected as a primary contig.

## 253 **SNP marker identification**

254           After trimming off 10x barcodes and hexamers, all pooled Illumina reads from the 10x  
255 sc-CNV libraries (61.7 Gb) were re-aligned to the curated haploid assembly using *bowtie2*<sup>30</sup>.  
256 With 87.2% reads aligned, 989,132 raw SNPs were called with *samtools* and *bcftools*<sup>32</sup>. Three  
257 criteria were used to select potential allelic SNPs (578,209), including i) the alternative allele  
258 frequency must be between 0.38 to 0.62; ii) the alternative allele must be carried by 60-140  
259 reads; iii) the total sequencing depth at a SNP must be between 120-280x (as compared with  
260 genome-wide mode depth of 208x; Fig. 2b).

## 261 **Deletion marker identification and genotyping**

262           There were 10,452 regions of over 2 kb but without a single SNP marker defined (total:  
263 110.9 Mb). If the average sequencing depth of such a region was less than or equal to 146x  
264 (i.e., the value at the valley between middle and right-most peaks in sequencing depth  
265 distribution; Fig. 2b), it was selected as a deletion-like marker. This led to a list of 3,253 large-  
266 scale deletion markers (36.4 Mb), among which 237 contigs (12.5 Mb) did not have a single  
267 SNP marker. The remaining 7,199 regions (74.5 Mb) were defined as conserved between two  
268 haplotypes (Fig. 2b). For a deletion marker, raw reads of each nucleus were counted within  
269 the deletion with *bedtools*<sup>33</sup> and were further normalized as *reads per kilobase per million*  
270 *mapped reads (RPKM)* to reduce the effect of sequencing depth and deletion size. The  
271 genotype at such a deletion marker was initialized as *a* or *n*, where *a* means the presence of  
272 reads (or non-deletion, which might be changed to *b* during later linkage grouping and  
273 mapping) and *n* means an absence of reads (either deletion or not available; Fig. 2d).

## 274 **Variant phasing and CO identification**

275           Barcode in the raw reads were corrected using *cellranger* from 10x Genomics, with  
276 which 182.1 million read pairs (51.0 Gb) were clustered into 691 read sets. Reads of each read  
277 set were aligned to the curated assembly using *bowtie2*<sup>30</sup>, bases were called using *bcftools*<sup>34</sup>,  
278 and a simple bi-marker majority voting strategy was applied in phasing SNPs along each contig

279 (Fig. 2c). After phasing, we could identify COs within contigs to facilitate later genetic mapping,  
280 for example, there was a CO for the nucleus with “*nnTGnTGnnnGAnnA*”.

## 281 **Ploidy evaluation of single-cell sequencing**

282 For each nucleus, with short read alignment and base calling to the curated assembly,  
283 we counted the number of inter-genotype transitions (genotype *a* to *b* and *b* to *a*) at phased  
284 SNP markers over all contigs. Correlating this to the number of covered markers revealed two  
285 clusters of nuclei (Supplementary Figure 5c). One cluster with 217 nuclei showed that inter-  
286 genotype transitions increased linearly with the number of covered markers (while there were  
287 high ratios of more than 5 transitions in every 100 markers), which indicated the sequencing  
288 data were mixed from more than one nuclei. The other cluster of 445 nuclei (31.2 Gb with  
289 111.4 million read pairs) showed a limited increase (probably due to sequencing errors or  
290 markers from repetitive regions), which supported the expected haploid status.

## 291 **Imputation of virtual markers at ends of contigs**

292 Let *a* and *b* denote the parental genotypes. The genotype of a nucleus at both ends of  
293 a contig (referred to as virtual markers) can be represented by *aa*, *bb* or *ab* (or *ba*) where *aa/bb*  
294 indicates an identical genotype along the contig while *ab* (or *ba*) indicates a CO event in the  
295 regions of contig. Then we can build up genotype sequences at the two ends of all contigs  
296 (with SNP markers) by imputing at all nuclei. For example, given a contig, sequences of  
297 *aaaaa**ab**bbbbbbb* (marker 1) and *aaaaaa**a**bbbbbbb* (marker 2) means there is a CO (in bold)  
298 at the 7<sup>th</sup> (of 15) nuclei (Fig. 2c).

## 299 **Linkage grouping and genetic mapping**

300 All virtual markers (defined using SNP markers along contigs) were classified into 8  
301 linkage groups (653 contigs: 212.9 Mb) after pairwise comparison of their genotype sequences  
302 using *JoinMap4.0*<sup>22</sup> (with haploid population type: HAP; and logarithm of the odds (LOD) values  
303 larger than 3.0).

304           After filtering out contigs with >10% missing nuclei information or nuclei with >10%  
305 missing contigs, a high-quality genetic map consisting of 216 contigs (147.3 Mb, corresponding  
306 to 622.0 cM; Fig. 3a) was first obtained using regression mapping in *JoinMap* 4.0® with the  
307 following settings: LOD larger than 3.0, a “goodness-of-fit jump” threshold of 5.0 for removal  
308 of loci and a “two rounds” mapping strategy<sup>22</sup>. Genotype sequences imputed at contig ends or  
309 deletions (i.e., respective virtual markers) were used to integrate the remaining 723 contigs  
310 into the genetic map. For example, given a deletion marker (e.g., *p* and *q* in Fig. 2c-e), if the  
311 respective contig had already existed in the genetic map, phasing was only performed at the  
312 deletion (according to surrounding phased SNPs); otherwise, phasing plus positioning to the  
313 genetic map would be applied. Both operations were based on finding the minimum divergence  
314 of the genotype sequence of the marker to that of the other contigs (in the corresponding  
315 genetic map). The final genetic map was completed as 891 contigs of 228.0 Mb.

### 316 **Haplotype-specific PacBio read classification**

317           PacBio reads (19.9 Gb) were classified based on three major cases after being aligned  
318 to the curated assembly using *minimap2*<sup>35</sup>. First, a read covering phased SNP markers was  
319 directly clustered into the haplotype supported by the respective alleles in the read. Second, a  
320 read covering no SNP markers but overlapping a deletion marker was clustered into the  
321 respective genotype based on its phasing with neighboring imputed markers in genetic map.  
322 Third, a read in a conserved region was assigned to one of the haplotypes randomly. Overall,  
323 93.4% reads could be classified into two genotypes for eight linkage groups (Fig. 3a). Non-  
324 classified reads (6.6%) were found (by blasting) to be related to organelle genomes and  
325 repeats.

### 326 **Haplotype-genome assembly and scaffolding**

327           Independent assemblies were performed with sixteen sets of reads, i.e., for every two  
328 haplotypes in each of the eight linkage groups using *flye*<sup>24</sup> with the default settings. As an  
329 intermediate evaluation, combining eight assemblies from eight linkage groups could lead to  
330 two artificial assemblies with 992-1017 contigs and N50 values of 662.3-664.6 kb.

331 Using the 891 contigs of the curated assembled that were assigned to chromosomal  
332 positions with the genetic mapping, we created a pseudo reference genome, with which the  
333 newly assembled contigs were scaffolded using *RAGOO*<sup>36</sup>, leading to chromosome-level  
334 assemblies (i.e., those labeled with 'scaf' in Fig. 3b).

### 335 **Haplotype evaluation on the two haploid assemblies**

336 The genotypes of the sixteen assemblies were firstly identified by comparing *k*-mers in  
337 each assembly with Illumina WGS of the parental cultivar (*k*=21; Fig. 3c). Although evaluation  
338 can always be performed in each linkage group, we combined the eight linkage-group-wise  
339 assemblies for 'Currot'-genotype and the other eight for 'Orange Red'-genotype, respectively.

340 After polishing the assemblies respectively with the classified 'Currot'-genotype and  
341 'Orange Red'-genotype PacBio reads using *apollo*<sup>37</sup>, we built up two sets of haplotype-specific  
342 *k*-mers from the assemblies,  $r_C$  and  $r_O$ . Correspondingly, a set of 'Currot'-specific *k*-mers (with  
343 coverage from 10 to 60x),  $p_C$ , was selected from the parental Illumina WGS that did not exist  
344 in 'Orange Red' short reads (coverage over 1x) but in 'Rojo Pasion' pollen short reads  
345 (coverage from 10 to 300x); similarly, a set of 'Orange Red'-specific *k*-mers,  $p_O$ , was also  
346 collected. Then we intersected  $r_C$  and  $r_O$  with  $p_C$  and  $p_O$  respectively, leading to four subsets  
347  $r_C \cap p_C$ ,  $r_C \cap p_O$ ,  $r_O \cap p_C$ , and  $r_O \cap p_O$ . This calculation gave an average haplotyping accuracy of  
348 99.1% (Table 1). All *k*-mer processing (counting, intersecting and difference finding) were  
349 performed with *KMC*<sup>38</sup>. After haplotype validation, the assemblies were further polished with  
350 the respective parental short read alignment using *pilon*<sup>39</sup> (with options '--fix bases --mindepth  
351 0.85'). The final haplotype assembly sizes were 216.0 and 215.2 Mb for 'Currot'-genotype (93  
352 scaffolds, N50: 25.8 Mb) and 'Orange Red'-genotype (104 scaffolds, N50: 25.5 Mb),  
353 respectively (Table 1). Note, the eight main chromosome-level scaffolds of each haplotype  
354 made up ~99% of the respective assembly.

### 355 **Genome annotation**

356 We annotated protein-coding genes for each haplotype assembly by integrating  
357 evidences from *ab initio* gene predictions (using three tools *Augustus*<sup>40</sup>, *GlimmerHMM*<sup>41</sup> and

358 *SNAP*<sup>42</sup>), RNA-seq read assembled transcripts and homologous protein sequence alignments.  
359 We aligned protein sequences from the database UniProt/Swiss-Prot, *Arabidopsis thaliana*  
360 and *Prunus persica* to each haplotype assembly using the tool *Exonerate*<sup>43</sup> with the options “-  
361 -percent 60 --minintron 10 --maxintron 60000”. We mapped RNA-seq reads from reproductive  
362 buds, vegetative buds, flowers, leaves, fruits (except seeds) and bark tissues, as well as a  
363 published Apricot RNA-seq dataset<sup>23</sup>, using HISAT<sup>44</sup>, and we assembled the transcripts using  
364 *StringTie*<sup>45</sup>. Finally, we used the tool *EvidenceModeler*<sup>46</sup> to integrate the above evidence in  
365 order to generate consensus gene models for each haplotype assembly.

366 We annotated the transposon elements (TE) using the tools *RepeatModeler* and  
367 *RepeatMasker* (<http://www.repeatmasker.org>). We filtered the TE related genes based on their  
368 coordinates overlapping with TEs (overlapping percent > 30%), sequence alignment with TE-  
369 related protein sequences and *A. thaliana* TE related gene sequences (both requiring *blastn*  
370 alignment identity and coverage both larger than 30%).

371 We improved the resulting gene models using in-house scripts. Firstly, we ran a primary  
372 gene family clustering using *orthoFinder*<sup>47</sup> based on the resulting gene models from each  
373 haplotype to find haplotype-specific genes. We then aligned these specific gene sequences to  
374 the other haplotype using *blastn*<sup>48</sup> to check whether it was specific because the ortholog was  
375 unannotated in the other haplotype. For these potentially unannotated genes (*blastn* identity >  
376 60% and *blastn* coverage > 60%), we checked the gene models from *ab initio* prediction around  
377 the aligned regions to add the unannotated gene if both the gene model and the aligned region  
378 had an overlapping rate larger than 80%. We also directly generated new gene models based  
379 on the *Scipio*<sup>49</sup> alignment after confirming the existence of start codon, stop codon and splicing  
380 site. Finally, the completeness of assembly and annotation were evaluated by the *BUSCO*<sup>27</sup>  
381 v4 tool based on 2,326 eudicots single-copy orthologs from OrthoDB v10<sup>50</sup>. A similar process  
382 was used to filter for haplotype-specific genes (Supplementary Tables 2-3).

### 383 **Genome assembly comparison**

384 All genome assemblies, including ‘Rojo Pasion’ haplotypes, ‘Chuanzhihong’ apricot  
385 (*Prunus armeniaca*)<sup>23</sup>, Japanese apricot (*Prunus mume*)<sup>25</sup> and ‘Lovell’ peach (*Prunus*

386 *persica*)<sup>26</sup>, were aligned to each other using *nucmer* from the *MUMmer4*<sup>51</sup> toolbox with  
387 parameters '-max -l 40 -g 90 -b 100 -c 200'. The alignments were further filtered for alignment  
388 length (>100 bp) and identity (>90%), with which structural rearrangements and local variations  
389 were identified using *SyRI*<sup>12</sup>. To follow the nomenclature of the *Prunus* community, the 'Rojo  
390 Pasion' chromosomes were numbered according to the numbering in 'Lovell' peach<sup>26</sup>.

### 391 **Crossover identification and landscape creation**

392 All 220 million pollen nuclei-derived short read pairs were pooled and aligned to the  
393 'Currot'-genotype assembly, from which 739,342 SNP markers were defined with an  
394 alternative allele frequency distribution of 0.38 to 0.62 and alternative allele coverage of 50 to  
395 150x. Then, short reads of 445 nuclei were independently aligned to the 'Currot'-genotype  
396 assembly using *bowtie2*<sup>30</sup> and bases were called using *bcftools*<sup>34</sup>. Finally, *TIGER*<sup>52</sup> was used  
397 to identify COs. The landscape of COs from 369 nuclei with a sequencing depth over 0.1x was  
398 calculated within 500 kb sliding windows along each chromosome at a step of 50 kb (Fig. 4),  
399 where for each window, the recombination frequency (*cM/Mb*) was defined as  $C/n/(w/10^6)*$   
400 100%, where *C* is the number of recombinant nuclei in that window, *n* is the total number of  
401 nuclei (369) and *w* is the window size. *SNP/Mb* and *gene/Mb* were calculated for the same  
402 windows as  $x/(w/10^6)$ , where *x* was the count of the feature in the respective window.



## 403 **Acknowledgements**

404           The authors would like to thank Antonio Molina and Jose Egea for kindly providing plant  
405 material, Saurabh Pophaly for help in transferring the read data to public servers and Kristin  
406 Krause and Vidya Oruganti for useful discussions and comments for improving the manuscript.  
407 This work was funded by the “Humboldt Research Fellowship for Experienced Researchers”  
408 (Alexander von Humboldt Foundation) (J.A.C.), the Marie Skłodowska-Curie Individual  
409 Fellowship PrunMut (789673) (J.A.C.), the Deutsche Forschungsgemeinschaft (DFG, German  
410 Research Foundation) under Germany’s Excellence Strategy – EXC 2048/1– 390686111, and  
411 the European Research Council (ERC) Grant “INTERACT” (802629) (K.S.). C.K.  
412 acknowledges the ISAC SRL Emerging Leaders Program.

## 413 **Author contributions**

414           J.A.C, H.S. and K.S. designed the project. J.A.C., B.H., K. F.-D., C.K., D.R., and M.R.  
415 performed all wet-lab experiments. H.S., J.A.C, M.G., and W-B.J. performed all data analysis.  
416 J.A.C., H.S. and K.S. wrote the manuscript with input from all authors. All authors read and  
417 approved the final manuscript.

## 418 **Competing interests**

419           The authors declare no competing interests.

## 420 **Data availability**

421           Data supporting the findings of this work are available within the paper and its  
422 Supplementary Information files. Read data sequenced from two 10x sc-CNV libraries, one  
423 PacBio library from ‘Rojo Pasion’, two Illumina libraries for ‘Currot’ and ‘Orange Red’ that  
424 support the work in this study as well as the haploid assemblies and annotations generated  
425 are available in European Nucleotide Archive (ENA) under accession number “PRJEB37669”.  
426 Data was uploaded to ENA using EMBLmyGFF<sup>53</sup>. All other relevant data are available upon  
427 request.

428 **Code availability**

429           Customs scripts supporting this work are available at [github.com/schneeberger-](https://github.com/schneeberger-)

430 [lab/GameteBinning](https://github.com/schneeberger-lab/GameteBinning).

## 431 REFERENCES

- 432 1. Korfach, J. *et al.* De novo PacBio long-read and phased avian genome assemblies  
433 correct and add to reference genes generated with intermediate and short reads.  
434 *Gigascience* **6**, 1–16 (2017).
- 435 2. Koren, S. *et al.* De novo assembly of haplotype-resolved genomes with trio binning. *Nat.*  
436 *Biotechnol.* **36**, 1174–1182 (2018).
- 437 3. Yang, H., Chen, X. & Wong, W. H. Completely phased genome sequencing through  
438 chromosome sorting. *Proc. Natl. Acad. Sci. U. S. A.* **108**, 12–17 (2011).
- 439 4. Selvaraj, S., Dixon, J. R., Bansal, V. & Ren, B. Whole-genome haplotype reconstruction  
440 using proximity-ligation and shotgun sequencing. *Nat. Biotechnol.* **31**, 1111–1118  
441 (2013).
- 442 5. Zhang, X., Zhang, S., Zhao, Q., Ming, R. & Tang, H. Assembly of allele-aware,  
443 chromosomal-scale autopolyploid genomes based on Hi-C data. *Nat. Plants* **5**, 833–845  
444 (2019).
- 445 6. Falconer, E. & Lansdorp, P. M. *Strand-seq*: A unifying tool for studies of chromosome  
446 segregation. *Semin. Cell Dev. Biol.* **24**, 643–652 (2013).
- 447 7. Zhang, X., Wu, R., Wang, Y., Yu, J. & Tang, H. Unzipping haplotypes in diploid and  
448 polyploid genomes. *Comput. Struct. Biotechnol. J.* **18**, 66–72 (2020).
- 449 8. Li, R. *et al.* Inference of Chromosome-length Haplotypes Using Genomic Data of Three  
450 to Five Single Gametes. *bioRxiv* 361873 (2018). doi:10.1101/361873
- 451 9. Kirkness, E. F. *et al.* Sequencing of isolated sperm cells for direct haplotyping of a  
452 human genome. *Genome Res.* **23**, 826–832 (2013).
- 453 10. Shi, D. *et al.* Single-pollen-cell sequencing for gamete-based phased diploid genome  
454 assembly in plants. *Genome Res.* 1–11 (2019).
- 455 11. Wu, J. *et al.* The genome of the pear (*Pyrus bretschneideri* Rehd.). *Genome Res.* **23**,  
456 396–408 (2013).
- 457 12. Goel, M., Sun, H., Jiao, W. B. & Schneeberger, K. *SyRI*: finding genomic  
458 rearrangements and local sequence differences from whole-genome assemblies.

- 459 *Genome Biol.* **20**, 1–13 (2019).
- 460 13. Jiao, W. B. & Schneeberger, K. Chromosome-level assemblies of multiple Arabidopsis  
461 genomes reveal hotspots of rearrangements with altered evolutionary dynamics. *Nat.*  
462 *Commun.* **11**, 1–10 (2020).
- 463 14. Amarasinghe, S. L. *et al.* Opportunities and challenges in long-read sequencing data  
464 analysis. *Genome Biol.* **21**, 1–16 (2020).
- 465 15. Sun, H. *et al.* Linked-read sequencing of gametes allows efficient genome-wide analysis  
466 of meiotic recombination. *Nat. Commun.* **10**, 1–9 (2019).
- 467 16. Dréau, A., Venu, V., Avdievich, E., Gaspar, L. & Jones, F. C. Genome-wide  
468 recombination map construction from single individuals using linked-read sequencing.  
469 *Nat. Commun.* **10**, (2019).
- 470 17. Egea, J., Dicenta, F. & Burgos, L. ‘Rojo Pasion’ apricot. *Hortscience* **39**, 1490–1491  
471 (2004).
- 472 18. Koren, S. *et al.* *Canu*: scalable and accurate long-read assembly via adaptive k-mer  
473 weighting and repeat separation. *Genome Res.* **27**, 722–736 (2017).
- 474 19. Sun, H., Ding, J., Piednoël, M. & Schneeberger, K. *FindGSE*: Estimating genome size  
475 variation within human and Arabidopsis using *k*-mer frequencies. *Bioinformatics* **34**,  
476 550–557 (2018).
- 477 20. Kron, P. & Husband, B. C. Using flow cytometry to estimate pollen DNA content:  
478 Improved methodology and applications. *Ann. Bot.* **110**, 1067–1078 (2012).
- 479 21. Julian, C., Rodrigo, J. & Herrero, M. Stamen development and winter dormancy in  
480 apricot (*Prunus armeniaca*). *Ann. Bot.* **108**, 617–625 (2011).
- 481 22. van Ooijen, J. W. JoinMap® 4, Software for the calculation of genetic linkage maps in  
482 experimental populations. Wageningen, Netherlands: Kyazma B.V. (2006).
- 483 23. Jiang, F. *et al.* The apricot (*Prunus armeniaca* L.) genome elucidates Rosaceae  
484 evolution and beta-carotenoid synthesis. *Hortic. Res.* **6**, 1–12 (2019).
- 485 24. Kolmogorov, M., Yuan, J., Lin, Y. & Pevzner, P. A. Assembly of long, error-prone reads  
486 using repeat graphs. *Nat. Biotechnol.* **37**, 540–546 (2019).

- 487 25. Zhang, Q. *et al.* The genome of *Prunus mume*. *Nat. Commun.* **3**, 1–8 (2012).
- 488 26. Verde, I. *et al.* The high-quality draft genome of peach (*Prunus persica*) identifies unique  
489 patterns of genetic diversity, domestication and genome evolution. *Nat. Genet.* **45**, 487–  
490 494 (2013).
- 491 27. Simão, F. A., Waterhouse, R. M., Ioannidis, P., Kriventseva, E. V. & Zdobnov, E. M.  
492 BUSCO: Assessing genome assembly and annotation completeness with single-copy  
493 orthologs. *Bioinformatics* **31**, 3210–3212 (2015).
- 494 28. Loureiro, J. Two new nuclear isolation buffers for plant DNA flow cytometry: A test with  
495 37 species. *Ann. Bot.* 875–888 (2007).
- 496 29. Marçais, G. & Kingsford, C. A fast, lock-free approach for efficient parallel counting of  
497 occurrences of k-mers. *Bioinformatics* **27**, 764–770 (2011).
- 498 30. Langmead, B., Trapnell, C., Pop, M. & Salzberg, S. L. Ultrafast and memory-efficient  
499 alignment of short DNA sequences to the human genome. *Genome Biol.* **10**, 1–10  
500 (2009).
- 501 31. Roach, M. J., Schmidt, S. a. & Borneman, A. R. *Purge Haplotigs*: Allelic contig  
502 reassignment for third-gen diploid genome assemblies. *BMC Bioinformatics* **19**, 1–10  
503 (2018).
- 504 32. Li, H. *et al.* The Sequence Alignment/Map format and SAMtools. *Bioinformatics* **25**,  
505 2078–2079 (2009).
- 506 33. Quinlan, A. R. & Hall, I. M. *BEDTools*: A flexible suite of utilities for comparing genomic  
507 features. *Bioinformatics* **26**, 841–842 (2010).
- 508 34. Li, H. A statistical framework for SNP calling, mutation discovery, association mapping  
509 and population genetical parameter estimation from sequencing data. *Bioinformatics* **27**,  
510 2987–2993 (2011).
- 511 35. Li, H. *Minimap2*: Pairwise alignment for nucleotide sequences. *Bioinformatics* **34**, 3094–  
512 3100 (2018).
- 513 36. Alonge, M. *et al.* *RaGOO*: Fast and accurate reference-guided scaffolding of draft  
514 genomes. *Genome Biol.* **20**, 1–17 (2019).

- 515 37. Firtina, C. *et al.* Apollo: A Sequencing-Technology-Independent, Scalable, and Accurate  
516 Assembly Polishing Algorithm. *Bioinformatics* 1–10 (2020).
- 517 38. Kokot, M., Dlugosz, M. & Deorowicz, S. KMC 3: counting and manipulating k-mer  
518 statistics. *Bioinformatics* **33**, 2759–2761 (2017).
- 519 39. Walker, B. J. *et al.* Pilon: An integrated tool for comprehensive microbial variant  
520 detection and genome assembly improvement. *PLoS One* **9**, 1–14 (2014).
- 521 40. Stanke, M. *et al.* AUGUSTUS: Ab initio prediction of alternative transcripts. *Nucleic*  
522 *Acids Res.* **34**, 435–439 (2006).
- 523 41. Majoros, W. H., Pertea, M. & Salzberg, S. L. TigrScan and GlimmerHMM: Two open  
524 source ab initio eukaryotic gene-finders. *Bioinformatics* **20**, 2878–2879 (2004).
- 525 42. Johnson, A. D. *et al.* SNAP: A web-based tool for identification and annotation of proxy  
526 SNPs using HapMap. *Bioinformatics* **24**, 2938–2939 (2008).
- 527 43. Slater, G. S. C. & Birney, E. Automated generation of heuristics for biological sequence  
528 comparison. *BMC Bioinformatics* **6**, 1–11 (2005).
- 529 44. Kim, D., Langmead, B. & Salzberg, S. L. HISAT: a fast spliced aligner with low memory  
530 requirements Daehwan HHS Public Access. *Nat. Methods* **12**, 357–360 (2015).
- 531 45. Pertea, M. *et al.* StringTie enables improved reconstruction of a transcriptome from  
532 RNA-seq reads. *Nat. Biotechnol.* **33**, 290–295 (2015).
- 533 46. Haas, B. J. *et al.* Automated eukaryotic gene structure annotation using  
534 EVIDENCEModeler and the Program to Assemble Spliced Alignments. *Genome Biol.* **9**,  
535 1–22 (2008).
- 536 47. Emms, D. M. & Kelly, S. OrthoFinder: Phylogenetic orthology inference for comparative  
537 genomics. *Genome Biol.* **20**, 1–14 (2019).
- 538 48. Altschul, S. F., Gish, W., Miller, W., Myers, E. W. & Lipman, D. J. Basic local alignment  
539 search tool. *J. Mol. Biol.* **215**, 403–410 (1990).
- 540 49. Keller, O., Odronitz, F., Stanke, M., Kollmar, M. & Waack, S. Scipio: Using protein  
541 sequences to determine the precise exon/intron structures of genes and their orthologs  
542 in closely related species. *BMC Bioinformatics* **9**, 1–12 (2008).

- 543 50. Kriventseva, E. V. *et al.* OrthoDB v10: Sampling the diversity of animal, plant, fungal,  
544 protist, bacterial and viral genomes for evolutionary and functional annotations of  
545 orthologs. *Nucleic Acids Res.* **47**, D807–D811 (2019).
- 546 51. Marçais, G. *et al.* MUMmer4: A fast and versatile genome alignment system. *PLoS*  
547 *Comput. Biol.* **14**, 1–14 (2018).
- 548 52. Rowan, B. A., Patel, V., Weigel, D. & Schneeberger, K. Rapid and inexpensive whole-  
549 genome genotyping-by-sequencing for crossover localization and fine-scale genetic  
550 mapping. *G3 Genes, Genomes, Genet.* **5**, 385–398 (2015).
- 551 53. Norling, M., Jareborg, N. & Dainat, J. EMBLmyGFF3: A converter facilitating genome  
552 annotation submission to European Nucleotide Archive. *BMC Res. Notes* **11**, 1–5  
553 (2018).
- 554
- 555

## 556 **Figure legends**

557 **Figure 1. Overview of gamete binning.** **a.** Extraction of gamete nuclei. **b.** Single-cell  
558 genome sequencing of haploid gametes and haplotype phasing. **c.** Genetic map  
559 construction based on the recombination patterns in the gamete genomes. **d.**  
560 Long-read sequencing of somatic material. **e.** Separation of long reads based on  
561 genetic linkage groups using phased alleles. **f.** Independent assembly of each  
562 haplotype of each linkage group. **g.** Scaffolding assemblies to chromosome-level  
563 using the gamete-derived genetic map.

564 **Figure 2. Single-pollen nuclei sequencing, variant phasing and genetic mapping.**

565 **a.** Sequencing depths of 691 pollen nuclei. **b.** Sequencing depth histogram of  
566 pooled pollen short reads. The left-most peak revealed 0.9% of the genome that  
567 were not well covered in the pollen read sets (i.e.,  $\leq 5x$ ). The middle peak  
568 indicated regions covered only by half of the genomes and present in only one of  
569 the haplotypes, and the right-most peak indicated regions, which were present in  
570 both haplotypes and showed the expected coverage. In regions represented in  
571 both haplotypes, 578,209 SNPs were defined. Regions without SNP markers  
572 were classified into 3,253 deletions and 7,199 conserved regions (Methods). **c.**  
573 SNP phasing along contigs. Genotyping was first performed for each individual  
574 nuclei at each SNP marker. As shown, both genotypes (in red and blue) were  
575 mixed in the curated but mosaic assembly. After phasing, 8 and 7 nuclei were  
576 respectively clustered for genotype A and B, and crossover could be identified.  
577 With this, representative markers were imputed at ends of contigs. **d.** Imputation  
578 of markers at deletions by genotyping using normalized read count. Two cases  
579 were considered for phasing (and positioning) a deletion marker (in the genetic



580 map). If it was linked with surrounding SNP alleles, it could be phased  
581 accordingly; otherwise, comparison its genotype sequence to genotype  
582 sequences of all other markers (including SNP-derived markers at ends of  
583 contigs) would be performed to find its value of phase (and positioning). **e.**  
584 Linkage group and genetic map construction using the set of imputed markers  
585 (SNP-derived markers labeled as 1-8 and deletion markers as  $p$  and  $q$ ). For  
586 example, the genotype sequences of 6, 8 and  $q$  needed to be flipped (i.e., phase  
587 values were 1 - contig phasing). Further ordering of the markers (using *JoinMap*)  
588 led to linkage group-wise genetic maps.

589 **Figure 3. Genetic mapping, haplotype-specific assembly and validation.** **a.** Top:  
590 Genetic map with a total genetic length of 622.0 cM (Methods). Middle: up to 2  
591 Gb reads were assigned to one of the two haplotypes of each linkage group.  
592 Bottom: a combination of haplotype-A/B linkage groups led to two assemblies  
593 with 214.6 and 215.3 Mb. **b.** Contig size distributions before (ctg-A, ctg-B) and  
594 after scaffolding (scaf-CU for the assembly with sequence from 'Currot'; and scaf-  
595 OR for the assembly with sequence from 'Orange Red'). After scaffolding, eight  
596 chromosome-scale pseudo-molecules were obtained for each haplotype as  
597 labeled by "Chrs". **c.** Haplotype validation for the two assemblies of each linkage  
598 group (LG-1-8) using parent-specific  $k$ -mers (of 'Orange Red' and 'Currot'). With  
599 each linkage group, the two assemblies could be clearly identified as either  
600 'Currot'-haplotype or 'Orange Red'-haplotype using parental  $k$ -mers. After  
601 combining the 'Currot'-related assemblies and 'Orange Red'-related assemblies  
602 to genome-level,  $k$ -mer comparison revealed a haplotype accuracy of 99.1%. **d.**  
603 Using the 'Currot'-haplotype as representative and comparing it to the assembly  
604 of the double haploid *Prunus* ssp. reference genome (*Prunus persica*, and other

605 closely-related species; Supplementary Figure 6) revealed high levels of synteny  
606 and thus implies high accuracy of the genetic map and chromosome-level  
607 scaffolding.

608 **Figure 4. Structural genome variations and meiotic recombination.** Top:  
609 recombination landscape created with sliding windows of 500 kb at a step of 50  
610 kb with COs detected in all single pollen nuclei (with coverage over 0.1x), coupled  
611 with SNP density and gene density. For x-axis, coordinates were based on the  
612 haploid assembly of 'Currot'-genotype. For y-axis, all features were scaled to 1.0,  
613 which stands for a maximum of 18 for recombination frequency (*cM/Mb*), 7,410  
614 for SNP density and 480 for gene density. Bottom: structural variations (>50 kb)  
615 identified between the two haploid assemblies. In general, crossovers are almost  
616 completely absent in SVs, for example, at LG2:11.0–14.5 Mb (inversion case)  
617 and LG5:16.0–18.2 Mb (translocation case).

618 **Figure 5. Non-allelic crossovers and its consequences.** **a.** Illustration of a non-  
619 allelic crossover which results in a chromosomal anomaly. **b.** Analysis of a single-  
620 pollen nuclei, which revealed a non-allelic CO resulting in the duplication of a  
621 large chromosomal segment. The short-read alignments of a haploid nuclei  
622 revealed a pseudo-heterozygous region with increased read coverage, which is  
623 the hallmark of a long duplication specific to this genome. All other chromosomes  
624 were haploid (not shown). (Top row: 'Currot' allele frequency, SNP density (in  
625 sliding windows of 500 kb at a step of 50 kb), and read coverage scaled by SNP  
626 density. Middle row: count of 'Currot' or 'Orange Red' alleles at SNP markers.  
627 Bottom row: diagram illustrating how a non-allelic CO in transposed regions (as  
628 indicated by yellow rectangles) resulted in a large duplication, i.e., the original

629 homologous chromosomal regions labelled with “4” and “5” are now part of the  
630 same newly formed chromosome.

631

632 **Tables**633 **Table 1 Assembly and validation statistics of two haplotype-resolved genome assemblies**

| Haploid assemblies of<br>'Rojo Pasion' | Number of genome-specific <i>k</i> -mers<br>common with parental WGS of |              | Precision in<br>haplotyping | Size [Mb] | Chromosome<br>scaffolds | N50 [Mb] | Protein-coding genes<br>(Total genes) |
|----------------------------------------|-------------------------------------------------------------------------|--------------|-----------------------------|-----------|-------------------------|----------|---------------------------------------|
|                                        | 'Currot'                                                                | 'Orange Red' |                             |           |                         |          |                                       |
| 'Currot'-haplotype                     | 12,754,496                                                              | 162,794      | 98.7%                       | 216.0     | 8                       | 25.8     | 30,661<br>(52,472)                    |
| 'Orange Red'-haplotype                 | 108,261                                                                 | 16,566,104   | 99.4%                       | 215.2     | 8                       | 25.5     | 30,378<br>(51,701)                    |

634

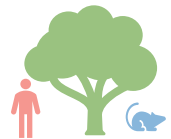

Diploid individual

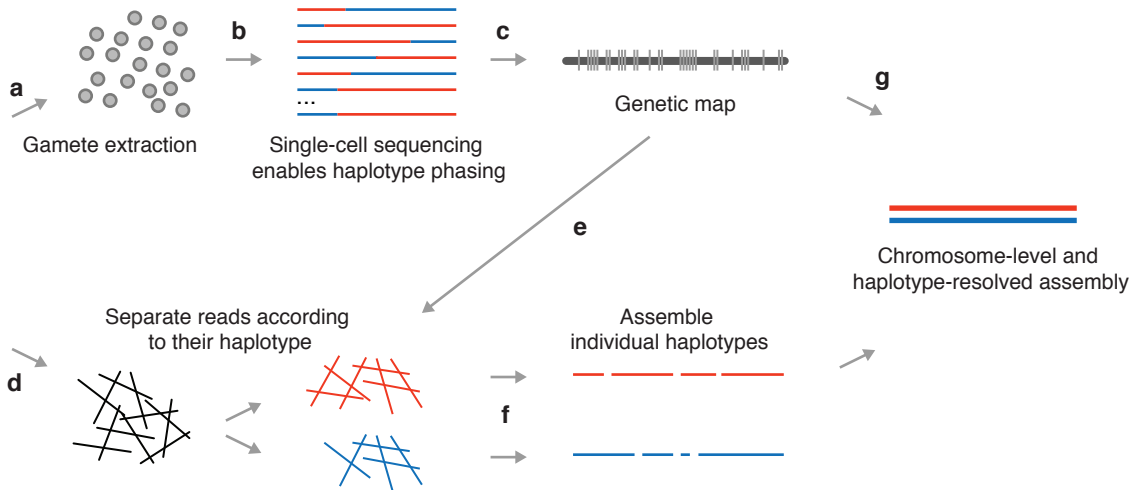

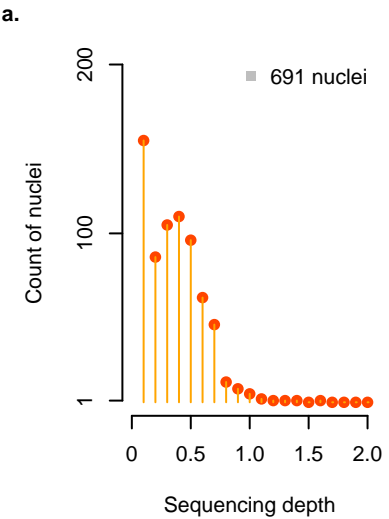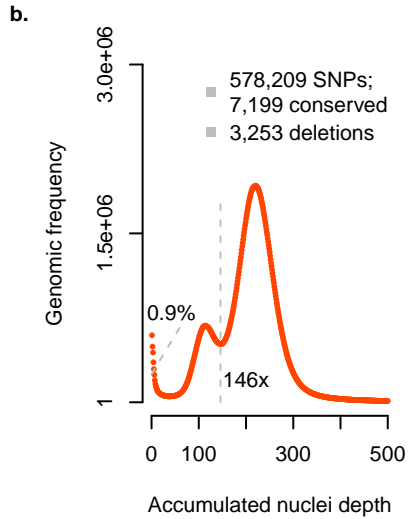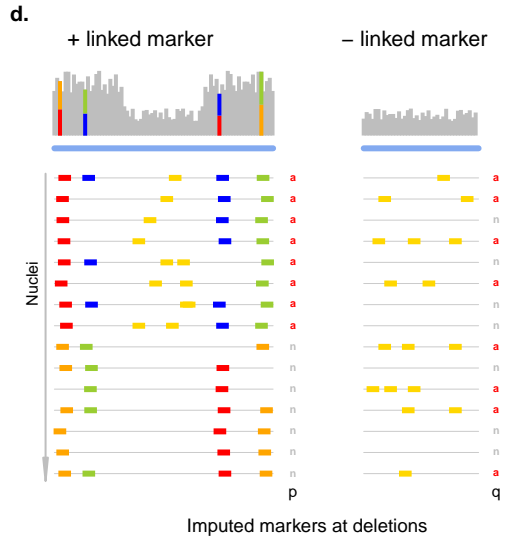

**c.** SNP-marker genotyping

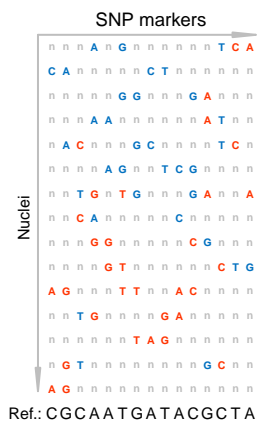

**e.** SNP phasing

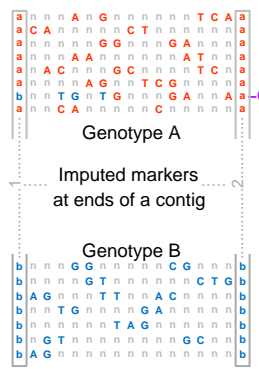

Contig phasing/grouping

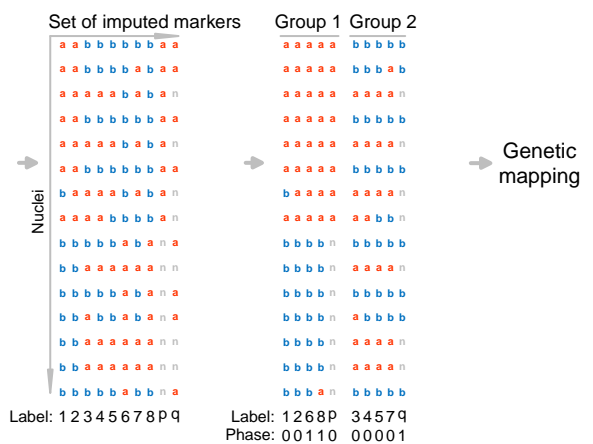

Genetic mapping

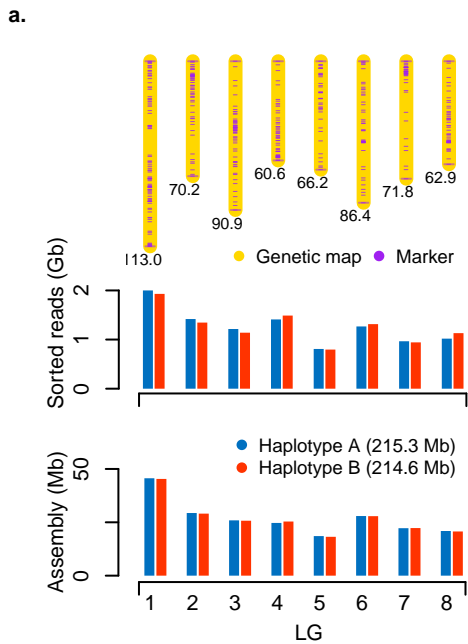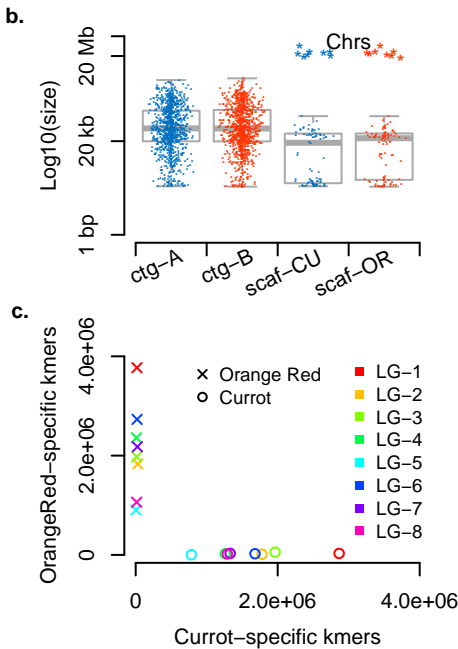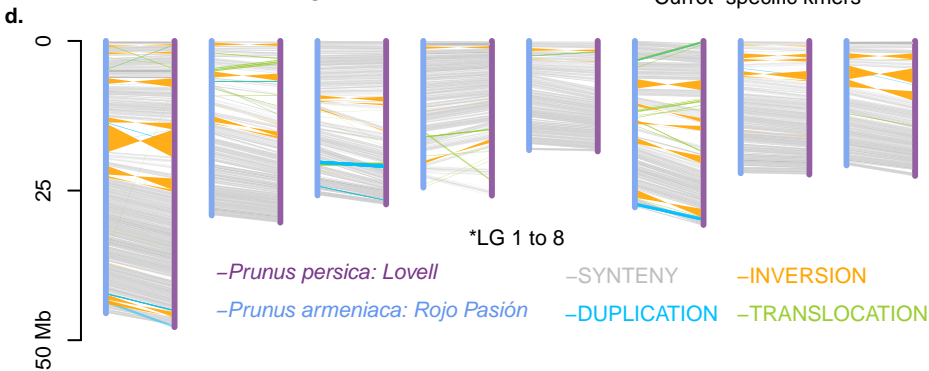

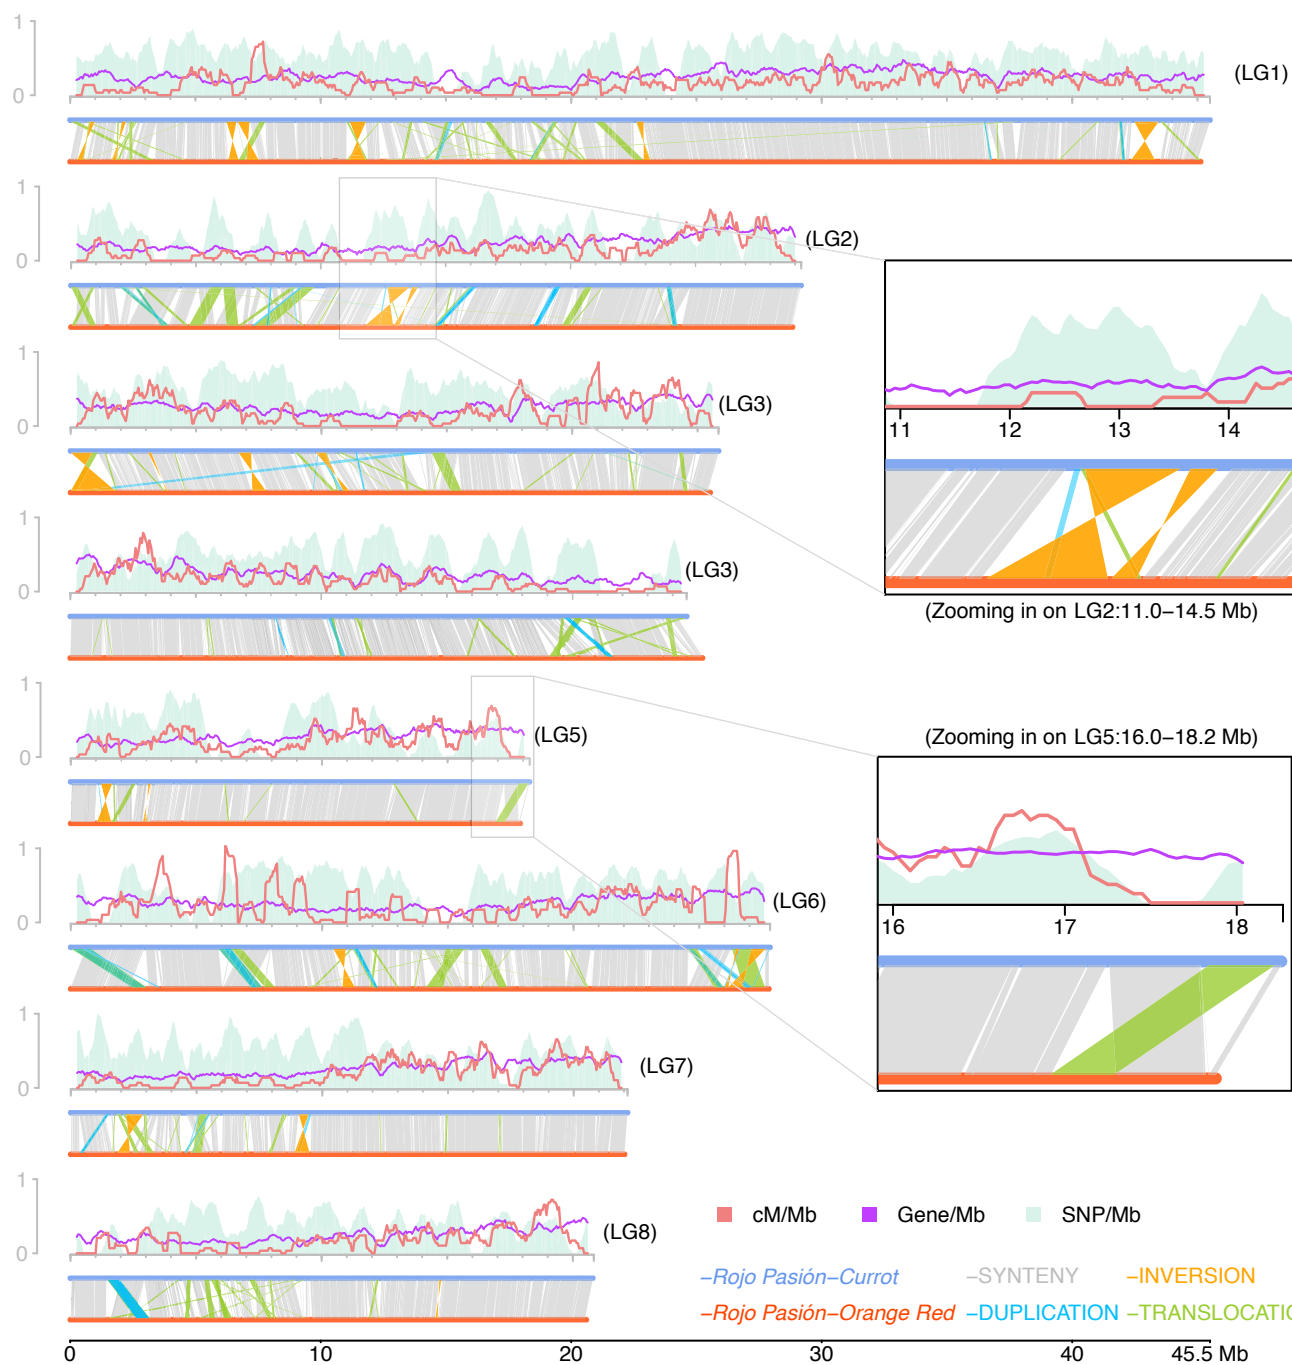



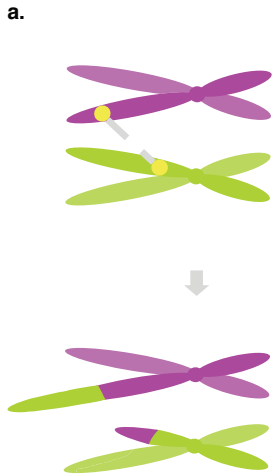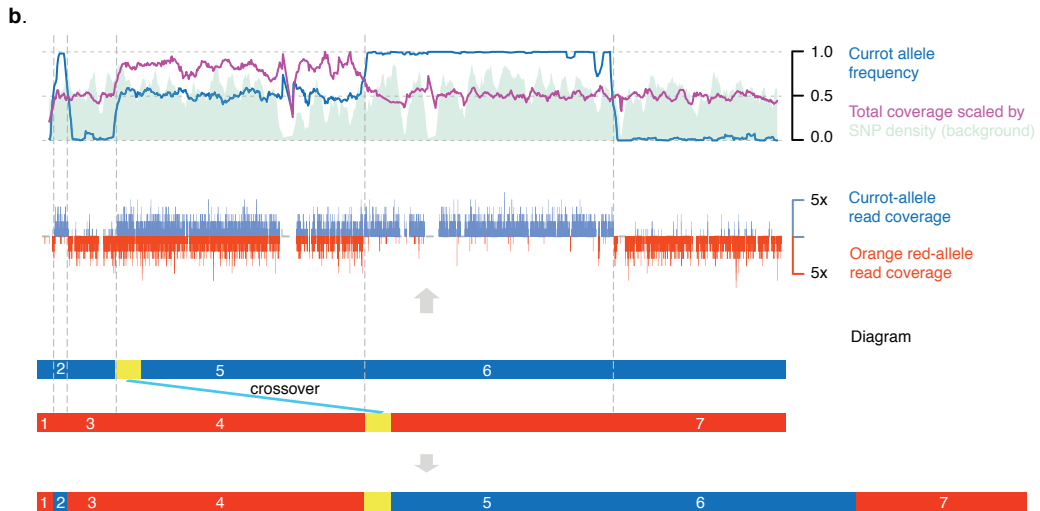

Source: https://www.biorxiv.org/content/10.1101/2020.04.24.060046v3.full.pdf
